# Supplementary material for: Medical cannabis regulation: an overview of models around the world with emphasis on the Brazilian scenario
Source: J Cannabis Res. 2022 Jun 16;4:33. doi: 10.1186/s42238-022-00142-z (PMC9202119; doi:10.1186/s42238-022-00142-z)
Supplement: Supplementary file 1 — Additional file 1: Table S1. Regulatory models [file 42238_2022_142_MOESM1_ESM.xlsx]

## Sheet: Regulatory models 
Geographic region	Country	Supply regulation				Demand regulation				Type of products		Technical criteria related to available products
		Extent of domestic production	Cultivation	Production licensing	Distribution mechanisms	Patient authorization/registration	Medical authorization/ registration	Qualifying diseases/medical conditions	Dispensing mechanisms	Pharmaceutical products/medicines	Herbal Cannabis	Quality control	Efficacy and safety proofs	Good manufacturing (and agricultural) practices	Packaging and labeling	Patient protection measures	Post-market monitoring	Cannabis use for research purposes	Regulatory authority	Year of last change	Legal framework	Observation	References
Europe	Austria	Other	Allowed for obtaining API to be supplied to the pharmaceutical industry	Official suppliers	Centralized distribution	Medical prescription of regularly registered medicines (or other Cannabis-based products)	Specific information were not found	Specific information were not found	Dispensing via (compounding) pharmacy or medical cannabis dispensaries	Other Cannabis products and preparations (including officinal, magistral and other unregistered products), besides regularly registered medicines	Not allowed	Quality specifications analogous to requirements for other API and medical products	Legal requirements depend on the product's category and marketing authorization procedure	Required	Specific information were not found				Austrian Agency for Health and Food Safety (Österreichische Agentur für Gesundheit und Ernährungssicherheit, AGES)	2008		Sativex® (Nabiximols) and Canemes® (Nabilone) are approved and available upon medical prescription. Magistral preparations (containing Dronabinol) can also be obtained in pharmacies. However, reimbursement or health coverage for Cannabis-based pharmaceutical products is still limited. Cannabis cultivation for medical and scientific purposes is allowed and is under the monopoly of the Austrian Age…	[1–4]
	Belgium	Import only	Not allowed	Not specified or not applicable	Not specified or not applicable	Medical prescription of regularly registered medicines (or other Cannabis-based products)	Not required	Product indications are defined by the registration process	Dispensing via pharmacy, upon medical (special) prescription	Multiple product types	Not allowed	Quality specifications analogous to requirements for other API and medical products	Required (regular marketing authorization procedure)	Required	Specific information were not found	None		No special office responsible for the production of cannabis for medical or scientific purposes has been established in Belgium so far.	Federal Agency for Medicines and Health products (FAMPH)	2015	Royal Decree	Sativex® (Nabiximols) is regularly approved as a medicine since 2012 and is supposed to be used by patients who did not benefit from other treatments. Patients can receive reimbursement if the medicine is prescribed by a neurologist and obtained from a hospital pharmacy. In Belgium, doctors are allowed to prescribe unlicensed medicines for their patients, such as medicinal herbal cannabis, on the…	[1–7]
	Croatia	Import only	Not allowed	Not specified or not applicable	Specific information were not found	Medical prescription of regularly registered medicines (or other Cannabis-based products)	Not required	A set of eligible diagnoses is pre-defined by the government	Dispensing via (compounding) pharmacy or medical cannabis dispensaries	Multiple product types	Not allowed	Legal requirements depend on the product's category and marketing authorization procedure	Legal requirements depend on the product's category and marketing authorization procedure	Not specified or not applicable	Specific information were not found	Since 2013, possession of small quantities of Cannabis for personal use only has been treated as a non-criminal offence, therefore not punished with imprisonment. However, cultivation remains forbidden by law.			Ministry of Health	2015	Amendment of the Ordinance on classifying, prescribing and dispensing medicines (2015)	Medicinal products containing dronabinol, nabiximols and nabilone can be imported upon medical prescription for individual patients, although they have not received marketing authorization yet. Since 2015, Cannabis-based pharmaceutical products containing THC, including magistral preparations, can also be prescribed. A limited set of qualifying conditions is defined by the government, including m…	[2, 4–6]
	Czech Republic	Other	Allowed for obtaining herbal medical Cannabis to be supplied to patients	Licensed producers	Centralized distribution	Medical prescription (or recommendation) + administrative approval	Specific authorization required	A set of eligible diagnoses is pre-defined by the government	Dispensing via (compounding) pharmacy or medical cannabis dispensaries	Regularly registered medical products	Herbal cannabis of pharmaceutical grade	Quality specifications analogous to requirements for other API and medical products	Legal requirements depend on the product's category and marketing authorization procedure	Required	Labeling special requirements	Possession of up to 30 grams per month and self-cultivation of up to 5 plants are allowed.			State Agency for Medical Cannabis (special department of the State Institute of Drug Control)	2013	Narcotic Control Act 167/1998 and Medicines Act 387/2007 (both amended in 2013)	The State Institute for Drug Control (SUKL) is responsible for issuing licenses for cultivation, as well as for centralizing the distribution of the obtained medical cannabis to pharmacies. Herbal cannabis of medicinal grade can also be imported from the Netherlands (via Dutch Office for Medicinal Cannabis), being available in (compounding) pharmacies upon medical prescription. Individual registr…	[2, 4–6, 8, 9]
	Denmark	Other	Allowed for obtaining API to be supplied to the pharmaceutical industry	Licensed producers	Not specified or not applicable	Medical prescription (or recommendation) + administrative approval	Not specified or not applicable	Product indications are defined by the registration process	Dispensing via (compounding) pharmacy or medical cannabis dispensaries	Regularly registered medical products	Herbal cannabis of pharmaceutical grade	Quality specifications analogous to requirements for other API and medical products	Required (regular marketing authorization procedure)	Required	Specific information were not found			Since 2018, specific licenses can be issued for development activities regarding medicinal Cannabis products.	Danish Medicines Agency (Lægemiddelstyrelsen)	2018	Act on a Medicinal Cannabis Pilot Programme (2018)	A medical Cannabis pilot program started in January 2018, with expected duration of four years. Since then, licenses have been issued for import Cannabis products for Danish patients in the pilot programme, as well as for cultivation, production and distribution activities within the national territory. Moreover, Sativex® is regularly approved as a medicine since 2011.
	Finland	Import only	Not allowed	Not specified or not applicable	Not specified or not applicable	Medical prescription (or recommendation) + administrative approval	Not specified or not applicable	Product indications are defined by the registration process	Dispensing via (compounding) pharmacy or medical cannabis dispensaries	Regularly registered medical products	Herbal cannabis of pharmaceutical grade	Quality specifications analogous to requirements for other API and medical products	Required (regular marketing authorization procedure)	Required	Specific information were not found				Finland Medicines Agency (FIMEA)	2014		Sativex® (Nabiximols) is regularly approved as a medicine and is available upon medical prescription. The use of herbal cannabis for medical purposes is allowed under specific conditions provided that a individual permission is obtained from Fimea. In this case, herbal cannabis of medicinal grade can be imported from the Netherlands (via Dutch Office for Medicinal Cannabis).	[1, 10, 11]
	France	Import only	Not allowed	Not specified or not applicable	Not specified or not applicable	Multiple mechanisms	Not specified or not applicable	Product indications are defined by the registration process	Dispensing via pharmacy, upon medical (special) prescription	Regularly registered medical products	Not allowed	Quality specifications analogous to requirements for other API and medical products	Required (regular marketing authorization procedure)	Required	Labeling special requirements	None	Not specified	Not specified	Agence Nationale de Sécurité du Médicament et des Produits de Santé (ANSM)	2013	Decree No. 2013-473 (modifying Public health code)	The Medical Cannabis regulatory framework in France is conservative and a specific medical program has not been established yet. Decree No. 2013-47 has modified the Public Health Code to authorize cannabinoid-based medicines. Sativex® (Nabiximols) is regularly approved as a medicine since 2014, being restricted to symptomatic relief of moderate or serious spasticity due to multiple sclerosis, for…	[1, 5, 6, 12]
	Germany	Other	Allowed for obtaining herbal medical Cannabis to be supplied to patients	Licensed producers	Specific information were not found	Medical prescription of regularly registered medicines (or other Cannabis-based products)	Not required	Not limited by the government	Dispensing via (compounding) pharmacy or medical cannabis dispensaries	Regularly registered medical products	Herbal cannabis of pharmaceutical grade	Quality specifications analogous to requirements for other API and medical products	Legal requirements depend on the product's category and marketing authorization procedure	Required	Specific information were not found				National Ministry of Health and Federal Institute for Medicines and Medicinal Products (BfArM)	2017	German Narcotic Drugs Act (Betäubungsmittelgesetz, BtMG); 'Cannabis as Medicine' Act	The access to cannabis-based pharmaceutical products by patients with serious diseases is regulated by the ‘Cannabis as Medicine’ Act. Costs can be covered by health insurance companies. Access to cannabis in the form of dried flowers is also provided by law. Prescription of medicinal cannabis is only allowed when conventional treatments (using authorized medicines) do not produce the expected ef…
	Greece	Internalization of the entire production chain	Allowed for obtaining API to be supplied to the pharmaceutical industry	Licensed producers	Centralized distribution	Specific information were not found	Specific information were not found	Specific information were not found	Specific information were not found	Specific information were not found	Not allowed	Specific information were not found	Specific information were not found	Required	Specific information were not found				Ministry of Health; Ministry of Agricultural Development and Food; National Organization for Medicines (EOF).	2018	Law 4523/2018	Since 2017, certain cannabis products can be imported under prescription and a specific procedure to be followed and supervised by the National Drug Organization (EOF), however, no marketing authorizations have been granted for cannabis-based medicines so far. In 2018, the Law 4523/2018 established conditions for cannabis cultivation as API, as well as for processing and manufacturing of medicina…	[4, 9, 12]
	Iceland	Import only	Not allowed	Not specified or not applicable	Not specified or not applicable	Medical prescription of regularly registered medicines (or other Cannabis-based products)	Not specified or not applicable	Product indications are defined by the registration process	Dispensing via pharmacy, upon medical (special) prescription	Regularly registered medical products	Not allowed	Quality specifications analogous to requirements for other API and medical products	Required (regular marketing authorization procedure)	Required		Possession of small quantities of Cannabis for personal use is not punished with imprisonment.			Icelandic Medicines Agency (IMA)	2012	Medicinal Products Act No. 100/2020; Habit-forming and Narcotic Substances Act No. 65/1974	Sativex® (Nabiximols) is regularly approved as a medicine since 2012 and is available in pharmacies upon prescription issued by a neurologist. The medicine is indicated for the relief of symptoms such as neuropathic pain and spasticity in patients suffering from multiple sclerosis
	Ireland	Import only	Not allowed	Not specified or not applicable	Not specified or not applicable	Medical prescription of regularly registered medicines (or other Cannabis-based products)	Specific information were not found	Product indications are defined by the registration process	Dispensing via pharmacy, upon medical (special) prescription	Regularly registered medical products	Not allowed	Quality specifications analogous to requirements for other API and medical products	Required (regular marketing authorization procedure)	Required					Health Product Regulatory Authority (HPRA)	2014		Sativex® has been approved by the Health Product Regulatory Authority (HPRA) in 2014 for multiple sclerosis (MS)-related spasticity in patients who are refractory to other anti-spasticity medication	[1, 4, 6, 13, 14]
	Italy	Internalization of the entire production chain	Allowed for obtaining herbal medical Cannabis to be supplied to patients	Official suppliers	Centralized distribution	Medical prescription of regularly registered medicines (or other Cannabis-based products)	Not required	A set of eligible diagnoses is pre-defined by the government	Dispensing via (compounding) pharmacy or medical cannabis dispensaries	Other Cannabis products and preparations (including officinal, magistral and other unregistered products), besides regularly registered medicines	Herbal cannabis of pharmaceutical grade	Quality specifications analogous to requirements for other API and medical products	Legal requirements depend on the product's category and marketing authorization procedure	Required	Specific information were not found				Ministry of Health, Office of Medicinal Cannabis; State Organization for Cannabis and province authorities.	2013/2015	Decree of the Presidency of the Italian Republic nº 309/1990 and its successive amendments; Ministerial Decree of 18 April 2007; Ministerial Decree of 23 January 2013	The Ministry of Health issues permits for cultivation, production, manufacture, trade, export, transit and purchase. Public pharmacies do not need authorization. Cannabis-based pharmaceutical products can be prepared in pharmacies upon medical prescription. Herbal cannabis prescription is allowed, but only for symptomatic treatment in association with standard treatments, provided that patients d…	[4, 12]
	Malta	Internalization of the entire production chain	Allowed for multiple purposes	Licensed producers	Specific information were not found	Medical prescription (or recommendation) + administrative approval	Other	A set of eligible diagnoses is pre-defined by the government	Dispensing via (compounding) pharmacy or medical cannabis dispensaries	Other Cannabis products and preparations (including officinal, magistral and other unregistered products), besides regularly registered medicines	Not allowed	Quality specifications analogous to requirements for other API and medical products	Legal requirements depend on the product's category and marketing authorization procedure	Site safety features required	Specific information were not found	Cannabis possession has been decriminalized since 2015 and can no longer be punished with imprisonment.			Malta Enterprise (a Maltese government’s agency); Malta Medicines Authority	2019	Amendments to the Drug Dependence Ac; Production of Cannabis for Medicinal Use Act	The Law allows patients to get access to non-smoking medical cannabis preparations prescribed by specialists (doctors) registered in the Health Care Professional Act, which are available at pharmacies, after approval of a control card by the Superintendent of Public Health. In that case, other pharmaceutical alternatives must have been exhausted. Sativex® (Nabiximols) is regularly approved as a m…	[12, 15]
	Netherlands	Internalization of the entire production chain	Allowed for obtaining herbal medical Cannabis to be supplied to patients	Licensed producers	Centralized distribution	Multiple mechanisms	Not required	Not limited by the government	Dispensing via (compounding) pharmacy or medical cannabis dispensaries	Multiple product types	Herbal cannabis of pharmaceutical grade	Specific information were not found	Specific information were not found	Specific information were not found	Specific information were not found				Office of Medicinal Cannabis (OMC), under the Ministry of Health, Welfare and Sport	2003	Dutch Narcotics Act (Opium Wet)	Producers are licensed by the Dutch government and must sell all production to the Office of Medicinal Cannabis (OMC), which has a monopoly on supplying medicinal cannabis to pharmacies and general practitioners, thus complying with the of 1961 UN Convention terms. The OMC supplies five types of medicinal cannabis (Bedrocan®, Bedrobinol®, Bediol®, Bedica® and Bedrolite®), which present different …	[5]
	North Macedonia	Internalization of the entire production chain	Allowed for multiple purposes	Licensed producers	Non-centralized distribution	Multiple mechanisms	Not required	A set of eligible diagnoses is pre-defined by the government	Dispensing via pharmacy, upon medical (special) prescription	Other Cannabis products and preparations (including officinal, magistral and other unregistered products), besides regularly registered medicines	Herbal cannabis of pharmaceutical grade	Quality specifications analogous to requirements for other API and medical products	Not specified or not applicable	Site safety features required	Packaging and labeling special requirements			Institutions that carry out medical or scientific research can grow, produce, acquire, import, own, and use Cannabis and their preparations for medical or scientific research upon authorization from the Agency for Medicines and Medical Devices	Ministry of Health, National Agency for Medicinal Products and Medical Devices	2016	Amendment of the Law on Control on Opioid Drugs and Psychotropic Substances (2016)	The Ministry of Health is responsible for issuing licenses for cultivation of medical Cannabis within the national territory. An authorization from the Ministry of Agriculture is also required prior to the beginning of the cultivation activity. Cultivation must follow special security requirements. The obtained herbal material can be processed for obtaining Cannabis extracts, exclusively within t…	[1, 4–6, 9, 16]
	Norway	Import only	Not allowed	Not specified or not applicable	Not specified or not applicable	Medical prescription of regularly registered medicines (or other Cannabis-based products)	Not specified or not applicable	Product indications are defined by the registration process	Dispensing via pharmacy, upon medical (special) prescription	Regularly registered medical products	Herbal cannabis of pharmaceutical grade	Quality specifications analogous to requirements for other API and medical products	Legal requirements depend on the product's category and marketing authorization procedure	Required		Possession of up to 15g of Cannabis is considered for personal use and is not punished with imprisonment.			Norwegian Medicines Agency	2012		Sativex® (Nabiximols) is regularly approved as a medicine since 2012 and has been available since 2014. Herbal cannabis of medicinal grade can be imported from the Netherlands (via Dutch Office for Medicinal Cannabis). Other Cannabis-based medicinal products, containing dronabinol or nabilone, for instance, can also be imported upon individual authorizations through a compassionate use scheme. Pa…	[1, 12]
	Poland	Import only	Not allowed	Not specified or not applicable	Non-centralized distribution	Medical prescription (or recommendation) + administrative approval	Other	Not limited by the government	Dispensing via (compounding) pharmacy or medical cannabis dispensaries	Other Cannabis products and preparations (including officinal, magistral and other unregistered products), besides regularly registered medicines	Not allowed	Quality specifications analogous to requirements for other API and medical products	Legal requirements depend on the product's category and marketing authorization procedure	Specific information were not found	Specific information were not found	Possession of small quantities of Cannabis for personal use is not punished with imprisonment.			Ministry of Health	2017	Amendment of the Law on Prevention of Drug Abuse (Ustawa o przeciwdziałaniu narkomanii) (2017); Pharmaceutical Law (Prawo farmaceutyczne)	Medical Cannabis is regulated since 2017. Import of herbal Cannabis and derivatives is allowed by law, but cultivation of the species remains banned, with the exception of industrial hemp. Licensed wholesalers are responsible for supply to registered pharmacies. Patients may also require for individual import authorization of Cannabis-based medicinal products, including non-registered ones. Herba…	[1, 4–6, 9, 12, 17]
	Portugal	Internalization of the entire production chain	Allowed for obtaining API to be supplied to the pharmaceutical industry	Licensed producers	Non-centralized distribution	Multiple mechanisms	Not specified or not applicable	A set of eligible diagnoses is pre-defined by the government	Dispensing via pharmacy, upon medical (special) prescription	Multiple product types	Not allowed	Legal requirements depend on the product's category and marketing authorization procedure	Legal requirements depend on the product's category and marketing authorization procedure	Required	Specific information were not found	Possession of cannabis-based preparation or substances is allowed in limited quantities for own consumption.	Based on national pharmacovigilance system	Support and stimulation of scientific research on Cannabis therapeutic and pharmacological properties are provided by law and can be carried out by state laboratories, associate laboratories or research units of Universities. Research activities are subjected to specific authorization.	Autoridade Nacional do Medicamento e Produtos de Saúde (Infarmed)	2018-2019	Lei n.º 33/2018, Decreto-Lei n.º 8/2019; Deliberação nº 11/CD/2019 - Infarmed	Cultivation, manufacturing, distribution, and commercialization of medical cannabis or cannabis-based preparations in Portugal are subject to regulatory oversight byAutoridade Nacional do Medicamento e Produtos de Saúde (INFARMED). Sativex® (Nabiximols) is regularly approved as a medicine since 2012. There are legal mechanisms that allow access to medicines that are not sold in Portugal, namely t…
	Spain	Import only	Not allowed	Not specified or not applicable	Not specified or not applicable	Medical prescription of regularly registered medicines (or other Cannabis-based products)	Not specified or not applicable	Product indications are defined by the registration process	Dispensing via pharmacy, upon medical (special) prescription	Regularly registered medical products	Not allowed	Quality specifications analogous to requirements for other API and medical products	Required (regular marketing authorization procedure)	Required	Specific information were not found	None	Not specified	Not specified	Agencia Española de Medicamentos y Productos Sanitarios (AEMPS)	2015	Narcotics Law (1967); Organic Law on the Protection of Public Safety (2015)	According to the Narcotics Law (1967), narcotics are allowed to be used only for the industrial, therapeutic, scientific and teaching purposes. However, there are no specific regulations on Cannabis therapeutic use in Spain. Sativex® (Nabiximols) is regularly approved as a medicine since 2012 and is supposed to be used by patients who did not benefit from other treatments. Patients can resort to …	[4, 18, 19]
	Sweden	Import only	Not allowed	Not specified or not applicable	Not specified or not applicable	Medical prescription of regularly registered medicines (or other Cannabis-based products)	Not specified or not applicable	Product indications are defined by the registration process	Dispensing via pharmacy, upon medical (special) prescription	Regularly registered medical products	Not allowed	Quality specifications analogous to requirements for other API and medical products	Required (regular marketing authorization procedure)	Required	Specific information were not found				Swedish Medical Products Agency	2011		Sativex® (Nabiximols) is regularly approved as a medicine since 2011. Other medicines, such as those containing dronabinol or nabilone, can be obtained individually through a compassionate use scheme. Prescription rules for Cannabis-based medicines are not defined by law. Therefore, the definitions about the indications and conditions of use are mainly under the physician's responsibility.	[1, 5, 6, 12]
	Switzerland	Import only	Not allowed	Not specified or not applicable	Not specified or not applicable	Medical prescription (or recommendation) + administrative approval	Specific information were not found	Qualifying diagnoses are limited to ‘potentially life threatening’ conditions, but not identified in an exhaustive manner.	Dispensing via pharmacy, upon medical (special) prescription	Multiple product types	Not allowed	Legal requirements depend on the product's category and marketing authorization procedure	Partially required (e.g.: safety tests only)	Specific information were not found	Specific information were not found				OFSP and Swissmedic	2011	Reform of the Law on Narcotic Drugs	Prescription is restricted to either a commercially available medicine containing dronabinol (synthetic THC) or a magistral Cannabis preparation (tincture) containing 5 % of THC.
	United Kingdom	Internalization of the entire production chain	Allowed for obtaining API to be supplied to the pharmaceutical industry	Licensed producers	Centralized distribution	Medical prescription of regularly registered medicines (or other Cannabis-based products)	Not required	Product indications are defined by the registration process	Dispensing via pharmacy, upon medical (special) prescription	Regularly registered medical products	Not allowed	Quality specifications analogous to requirements for other API and medical products	Required (regular marketing authorization procedure)	Required	Packaging special requirements				Medicines and Medicinal Products Regulatory Agency (MHRA);	2018	Criminal Justice Law (Criminal Justice Act / Schedule 4)	Despite the legalization of medical cannabis since 2018, access is still limited within the National Health Service (NHS).The National Institute for Health and Care Excellence (NIHCE) recommend that Sativex or Epidiolex be prescribed for MS-related spasticity in adults and two severe refractory epilepsies, respectively. Sativex can be prescribed only by doctors specializing in neurology, rehabili…	[4, 12]
Oceania	Australia	Internalization of the entire production chain	Allowed for multiple purposes	Licensed producers	Centralized distribution	To be regulated at the state level	To be regulated at the state level	To be regulated at the state level	To be regulated at the state level	Regularly registered medical products	Subject to regulation at the state level	Quality specifications analogous to requirements for other API and medical products	Legal requirements depend on the product's category and marketing authorization procedure	Specific information were not found	Specific information were not found			The Office of Drug Control is responsible for issuing licenses for research purposes	Therapeutics Goods Administration (TGA); Office of Drug Control - Federal Department of Health and the Administration of Therapeutic Products (Various State and Territorial Government Departments also have regulatory responsibility)	2016	Narcotics Act 1967 (as amended by the Narcotics Amendment Act 12/2016)	Numerous Australian states and territories have legalized medical Cannabis since 2016, with qualifying conditions varying by jurisdiction. In the same year, the Narcotic Drug Amendment Act was approved, creating a national licensing scheme for cannabis cultivation and supply of medical and research purposes. The Office of Drug Control became responsible for regulating the operational aspects of t…	[6, 20–23]
	New Zealand	Internalization of the entire production chain	Allowed for multiple purposes	Licensed producers	Non-centralized distribution	Multiple mechanisms	Not required	Not limited by the government	Dispensing via pharmacy, upon medical (special) prescription	Other Cannabis products and preparations (including officinal, magistral and other unregistered products), besides regularly registered medicines	Herbal cannabis of pharmaceutical grade	Quality specifications analogous to requirements for other API and medical products	Legal requirements depend on the product's category and marketing authorization procedure	Required	Packaging and labeling special requirements		"Unapproved" cannabis products are monitored by the Medicinal Cannabis Agency for adverse effects	Licenses for research activities are issued by the Medicinal Cannabis Agency.	Medicinal Cannabis Agency, Ministry of Health	2019	Drug Abuse Regulations 1977 (Rule 22); Misuse of Drugs Act 1975; Medicines Act 1981; Medicines Regulations 1984; Misuse of Drugs (Medicinal Cannabis) Regulations 2019.	The Medicinal Cannabis Agency is responsible for ensuring that medicinal cannabis products meet the minimum quality standard, as well as for issuing licenses for cultivation, manufacture or supply of medicinal cannabis products. Cultivation is allowed for research, supply, manufacture and nursing purposes, provided that the conditions imposed by law are met. Security in cultivation place must be …
Asia and Middle-East	Israel	Internalization of the entire production chain	Allowed for multiple purposes	Licensed producers	Centralized distribution	Medical prescription of regularly registered medicines (or other Cannabis-based products)	Specific authorization required	A set of eligible diagnoses is pre-defined by the government	Dispensing via pharmacy or authorized distributor	Multiple product types	Herbal cannabis of pharmaceutical grade	Minimum set of tests (e.g.: identification, cannabinoid content, contaminants)	Specific information were not found	Specific information were not found	Specific information were not found	According to the license provisions determined by the Ministry of Health, consumption of 30 to 40 g per month is allowed. Patients must request an order through a doctor or have access to medical cannabis through an already licensed doctor.	Specific information were not found	Specific information were not found	IMCA, under the Ministry of Health	1992	Dangerous Drugs Ordinance	The use of medical Cannabis is allowed by law, being restricted to severe and chronic cancer-related pain. For other diseases, it is necessary to participate on a clinical trial. Clinical research is allowed with strict regulations.	[6, 9, 24]
Africa	South Africa	Internalization of the entire production chain	Allowed for multiple purposes	Licensed producers	Non-centralized distribution	Medical prescription (or recommendation) + administrative approval	Specific authorization required	Not limited by the government	Specific information were not found	Multiple product types	Herbal cannabis (non-pharmaceutical grade)	Minimum set of tests (e.g.: identification, cannabinoid content, contaminants)	Not required	Required	Specific information were not found	In 2018, the Constitutional Court of South Africa decriminalized cultivation and private use of cannabis.		Studies involving Cannabis for research purposes require a permit issued by the Director General of Health, along with SAHPRA approval.	South African Health Products Regulatory Authority (SAHPRA)	2019	Medicines and Related Substances Act (1965); Minister of Health, Act, 1965 (Act No. 101 of 1965). Government Notice No. 756 (23 May 2019).	There are no regularly registered Cannabis-based medicines in South Africa nowadays. Patients can get access to unregistered Cannabis products by applying for individual authorization, in terms of section 21 and 22 of the Medicines Act. Those medicinal cannabis products should be used under medical supervision and in exceptional circumstances. The quality of those unregistered products must be of…	[5, 6, 12]
Americas	Argentina	Other	Allowed for multiple purposes	Other	Other	Medical prescription (or recommendation) + administrative approval	Not specified or not applicable	Not limited by the government	Other	Multiple product types	Herbal cannabis (non-pharmaceutical grade)	Quality specifications analogous to requirements for other API and medical products	Legal requirements depend on the product's category and marketing authorization procedure	Specific information were not found	Not specified or not applicable	Since 2009, Cannabis is decriminalized for personal use in small amounts and for private consumption.		According to the current regulation, the State should promote scientific research in order to provide scientific evidence to support the safe use of medical Cannabis and its derivatives	Ministerio de Salud, Secretaría de Acceso a la Salud, Dirección Nacional de Medicamentos y Tecnologías Sanitarias; Administración Nacional de Medicamentos, Alimentos y Tecnología Médica (ANMAT)	2020	Ley 27350 (2017); Decreto 883/2020	Qualifying patients registered at the Cannabis Program (Reprocann) are allowed to access medical Cannabis either form home growing; 'solidary growers' or from pharmacies and other licensed sellers. According to the current regulation, the decision to prescribe medical Cannabis, according to the patient's clinical condition, is under the physician's responsibility. The Law provides that the costs …
	Brazil	Domestic manufacturing of pharmaceutical products from imported cannabis API	Not allowed	Other	Non-centralized distribution	Multiple mechanisms	Not required	Product indications are defined by the registration process	Dispensing via pharmacy, upon medical (special) prescription	Multiple product types	Not applicable	Legal requirements depend on the product's category and marketing authorization procedure	Legal requirements depend on the product's category and marketing authorization procedure	Required	Labeling special requirements			Research on Cannabis medical use is not regulated	Agência Nacional de Vigilância Sanitária (Anvisa)	2019	ANVISA RDC Nº 327/2019; ANVISA RDC Nº 335/2020; Portaria SVS/MS Nº 344/1998.	Mevatyl® (Nabiximols) is regularly approved as a medicine since 2017. In 2019, the regulatory category of “Cannabis Products” was created by ANVISA RDC Nº 327/2019, which made it possible to obtain a simplified authorization for cannabis-based products to be marketed in Brazil, valid for up to 5 years. In addition, individual import authorizations can be issued.	[4, 6, 25]
	Canada	Internalization of the entire production chain	Allowed for multiple purposes	Licensed producers	Non-centralized distribution	Medical prescription (or recommendation) + administrative approval	Not required	Not limited by the government	Other	Multiple product types	Herbal cannabis of pharmaceutical grade	Minimum set of tests (e.g.: identification, cannabinoid content, contaminants)	Specific information were not found	Required	Packaging and labeling special requirements	Public possession limits for authorized patients: the lesser of 150 grams or a 30-day supply of dried cannabis (or the equivalent in cannabis product).	Health Canada will be collecting and monitoring data from various cannabis surveys to better understand: trends, use patterns, and impacts for individuals who use cannabis for medical purposes	The Canadian Institutes of Health Research (CIHR) is investing significantly in research on cannabis and cannabinoids including, but not limited to, research related to use for medical purposes	Controlled Substances and Drugs Act, Regulations for Access to Cannabis for Medicinal Purposes	2018	Health Canada	Licensed producers may possess, produce, sell, provide, ship, deliver, transport and destroy marijuana or cannabis oil.	[4–6, 9, 13]
	Chile	Internalization of the entire production chain	Allowed for obtaining API to be supplied to the pharmaceutical industry	Licensed producers	Non-centralized distribution	Multiple mechanisms	Not specified or not applicable	Not limited by the government	Dispensing via pharmacy, upon medical (special) prescription	Multiple product types	Specific information were not found	Legal requirements depend on the product's category and marketing authorization procedure	Legal requirements depend on the product's category and marketing authorization procedure	Required	Specific information were not found	Public possession limits are not defined by law.	Specific information were not found	Scientific research on medicinal cannabis are provided by law.	Ministerio de Salud, Instituto de Salud Publica (ISP)	2015	Ley Nº 20000, Decreto Nº 84 de 2015	The regulatory framework is still being adapted and some parameters probably will be addressed in the next years.	[1, 4, 9, 26–28]
	Colombia	Internalization of the entire production chain	Allowed for multiple purposes	Licensed producers	Non-centralized distribution	Multiple mechanisms	Not specified or not applicable	Not limited by the government	Dispensing via pharmacy, upon medical (special) prescription	Multiple product types	Specific information were not found	Legal requirements depend on the product's category and marketing authorization procedure	Legal requirements depend on the product's category and marketing authorization procedure	Required	Labeling special requirements	Public possession limited to 20 grams of marijuana and autocultive not exceeding 20 cannabis plants.	Specific information were not found	Scientific research on medicinal cannabis are provided by law and can be carried out by universities and private research laboratory.	Ministerio de Salud y Protección Social / Ministry of Health and Social Protection; Sub-directorate of Control and Supervision of Chemical Substances and Narcotic Drugs.	2017	Ley N°1787 de 2016; Decreto N° 613 de 2017	According to the current regulatory framework, medical products made with no psychoactive Cannabis (THC content less than 1%) can be sold without medical special prescription.
	Jamaica	Import only	Allowed for patients for their own consumption and/or caregivers for direct supply to patients	Licensed producers	Non-centralized distribution	Medical prescription (or recommendation) + administrative approval	Not required	A set of eligible diagnoses is pre-defined by the government	Dispensing via (compounding) pharmacy or medical cannabis dispensaries	Other Cannabis products and preparations (including officinal, magistral and other unregistered products), besides regularly registered medicines	Herbal cannabis (non-pharmaceutical grade)	Not specified or not applicable	Not specified or not applicable	Not specified or not applicable	Not specified or not applicable	Possession of up to 2 oz is decriminalized and home cultivation for medicinal (or religious) use is allowed by law.			Cannabis Authorization Agency (CLA)	2015	Dangerous Drugs Act (Amended)	The Cannabis Authorization Agency (CLA) is responsible for regulating Jamaica’s medical cannabis model. Jamaican residents can get access to Cannabis for medicinal use provided that a recommendation is obtained from a local qualified health professional. Non-residents can get access to medicinal cannabis by simply declaring that they have been recommended by a health professional in another count…	[4, 29–32]
	Mexico	Internalization of the entire production chain	Allowed for obtaining API to be supplied to the pharmaceutical industry	Licensed producers	Specific information were not found	Medical prescription of regularly registered medicines (or other Cannabis-based products)	Specific authorization required	Specific information were not found	Dispensing via pharmacy, upon medical (special) prescription	Specific information were not found	Not allowed	Quality specifications analogous to requirements for other API and medical products	Specific information were not found	Required	Not specified or not applicable			Cannabis cultivation and production of Cannabis-based medicines for research purposes are provided for by law. Conducting studies within the national territory is subject to authorization by the COFEPRIS.	Comisión Federal para la Protección contra Riesgos Sanitarios (COFEPRIS)	2021	Reglamento de la Ley General de Salud en Materia de Control Sanitario para la Producción, Investigación y Uso Medicinal de la Cannabis y sus Derivados Farmacológicos.	The SENASICA (Servicio Nacional de Sanidad, Inocuidad y Calidad Agroalimentaria) is responsible for authorizing cultivation and harvesting activities, as well as the manufacture of Cannabis-based pharmaceutical products. Site safety requirements apply to the aforementioned activities. Professionals interested in prescribing medical Cannabis must apply for an authorization issued by COFEPRIS (Comi…
	Peru	Internalization of the entire production chain	Allowed for obtaining API to be supplied to the pharmaceutical industry	Licensed producers	Non-centralized distribution	Multiple mechanisms	Not required	Not limited by the government	Dispensing via pharmacy, upon medical (special) prescription	Multiple product types	Specific information were not found	Legal requirements depend on the product's category and marketing authorization procedure	Legal requirements depend on the product's category and marketing authorization procedure	Required	Specific information were not found	Public possession limited to 8 grams of marijuana or 2 grams of cannabis derived or quantity specified in medical prescription.	Based on national pharmacovigilance system	Scientific research on medicinal cannabis are provided by law and can be carried out by universities and private research laboratory.	Ministerio de Salud (MINSA), Dirección General de Medicamentos, Insumos y Drogas (DIGEMID), Instituto Nacional de Salud (INS). Ministerio de Agricultura y Riego (MINAGRI), Servicio Nacional de Sanidad Agraria (SENASA), Instituto Nacional de Innovación Agraria (INIA y el SENASA). Ministry of Health, General Directorate of Medicines, Supplies and Drugs, National Institute of Health and other sector…	2017	Ley Nº 30681, Decreto Supremo Nº 005-2019-SA	Patients must be registered in the "National Registry of Cannabis Patients Users". Among other requirements, the medical prescription must inform the concentration of active substance and the pharmaceutical form. The self-cultivation of medicinal Cannabis is not allowed.	[1, 4, 9]
	United States	Other	To be regulated at the state level	To be regulated at the state level	Not specified or not applicable	To be regulated at the state level	To be regulated at the state level	To be regulated at the state level	To be regulated at the state level	Subject to regulation at the state level	Subject to regulation at the state level	Legal requirements depend on the product's category and marketing authorization procedure	Legal requirements depend on the product's category and marketing authorization procedure	Not specified or not applicable	Not specified or not applicable				Food and Drug Administration (FDA); State authorities	2017	State regulations (It is legal in 28 states and the District of Columbia)	Cannabis is classified as a Schedule I drug according to the federal Controlled Substances Act (CSA), which criminalizes its cultivation, prescription, possession and distribution for any purpose. However, several states have passed laws authorizing the use of the species for medical purposes, and, in some cases, for recreational purposes as well. Moreover, Epidiolex® (CBD, oral solution) has bee…	[1, 33]
	Uruguay	Internalization of the entire production chain	Allowed for multiple purposes	Licensed producers	Non-centralized distribution	Multiple mechanisms	Not specified or not applicable	Not limited by the government	Dispensing via pharmacy, upon medical (special) prescription	Multiple product types	Herbal cannabis of pharmaceutical grade	Quality specifications analogous to requirements for other API and medical products	Required (regular marketing authorization procedure)	Required	Packaging and labeling special requirements	A quantity destined for personal use shall mean a quantity up to 40 grams of marijuana. Autocultive must not exceed 6 cannabis plants.	Based on national pharmacovigilance system	The "Centro Uruguayo de Estudios Avanzados en Cannabis (CUDEA Cannabis)" was created as a scientific, academic and interdisciplinary organ. Scientific research on cannabis and its applications in all areas of knowledge is declared of public interest.	Ministerio de Salud Pública / Ministry of Public Health	2015	Ley N°19172 de 2013; Decreto 46/2015; Decreto N° 94/2017	Uruguayan citizens aged 18 or over can register for one of three means of access to Cannabis: home cultivation for own use; joining collectives or Cannabis Clubs (UCC); or purchasing from government-owned pharmacies. Four suppliers are authorized to cultivate cannabis for medicinal use, from low-THC varieties (up to 9%), which are then supplied to government pharmacies. State’s Instituto de Regul…	[34, 35]
		REGULATORY POLICIES ALLOWING ACCESS TO MEDICAL CANNABIS THROUGH LEGAL EXCEPTIONS
		Antigua; Estonia; Georgia; Philippines
		COUNTRIES WITH REGULATORY MODELS UNDER DEVELOPMENT OR IMPLEMENTATION PHASE
		Barbados; Bolivia; Cyprus; Ecuador; Ghana; Lebanon; Lithuania; Luxembourg; Malawi; Romania; Siri Lanka; Eshwantini; Thailand; Vanuatu; Zambia; Zimbabwe
		LIST OF ABBREVIATIONS
		API	Active Pharmaceutical Ingredient
		AIDS	Acquired Immune Deficiency Syndrome
		CBD	Cannabidiol
		GAP	Good Agricultural Practices
		GMP	Good Pharmaceutical Practices
		(Δ9)-THC	Δ9-Tetrahydrocannabinol
		REFERENCES
		1.	Seddon T, Floodgate W (2020) Regulating Cannabis. Springer International Publishing, Cham
		2.	European Monitoring Centre for Drugs and Drug Addiction (2018) Cannabis legislation in Europe
		3.	Bramness JG, Dom G, Gual A, et al (2018) A Survey on the Medical Use of Cannabis in Europe: A Position Paper. Eur Addict Res 24:201–205. DOI: 10.1159/000492757
		4.	Aguilar S, Gutiérrez V, Sánchez L, Nougier M (2018) Medicinal cannabis policies and practices around the world. Int Drug Policy Consort. Briefing Paper 1-32
		5.	Health Products Regulatory Authority (2017) Cannabis for Medical Use - A Scientific Review
		6.	European Monitoring Centre for Drugs and Drug Addiction (2018) Medical use of cannabis and cannabinoids: questions and answers for policymaking
		7.	Tom Decorte (2019) Cannabis Regulation in Europe: Country Report Belgium
		8.	Blickman T (2014) Cannabis policy reform in Europe Bottom up rather than top down. Ser Legis Reform Drug Policies 3–24
		9.	Belackova V, Shanahan M, Ritter A (2018) Mapping regulatory models for medicinal cannabis: A matrix of options. Aust Heal Rev 42:403–411. DOI: 10.1071/AH16257
		10.	Sundheds-og Ældreministeriet (2019) Cannabisblomst (Cannabis flos). In: BEK nr 151, 19/02/2019. https://www.retsinformation.dk/eli/lta/2019/151. Accessed 8 Feb 2021
		11.	Maj Nygaard-Christensen, Vibeke Asmussen Frank (2019) Cannabis Regulation in Europe: Country Report Denmark
		12.	Abuhasira R, Shbiro L, Internal YL-EJ of, 2018 undefined Medical use of cannabis and cannabinoids containing products–Regulations in Europe and North America. Elsevier
		13.	Schlag AKK (2020) An Evaluation of Regulatory Regimes of Medical Cannabis: What Lessons Can Be Learned for the UK? Med Cannabis Cannabinoids 3:76–83. DOI: 10.1159/000505028
		14.	Heino Stöver, Ingo Ilja Michels, Bernd Werse, Tim Pfeiffer-Gerschel (2019) Cannabis Regulation in Europe: Country Report Germany
		15.	IMA Icelandic Medicines Agency (IMA) . https://www.ima.is/ima/faqs#c. Accessed 22 Apr 2021
		16.	Zaami S, Di Luca A, Di Luca N, Montanari Vergallo G (2018) Medical use of cannabis: Italian and European legislation. Eur Rev Med Pharmacol Sci 22:1161–1167
		17.	Korf DJ (2019) Cannabis Regulation in Europe : Country Report Netherlands
		18.	Medical cannabis in the Republic of North Macedonia. https://www.healtheuropa.eu/medical-cannabis-in-the-republic-of-north-macedonia/90983/. Accessed 20 Apr 2021
		19.	Ilikj M, Brchina I, Ugrinova L, et al (2020) GMP/GACP-new standards for quality assurance of cannabis. Maced Pharm Bull 66:
		20.	Dinis-Oliveira RJ (2019) A Perspetiva da Toxicologia Clínica Sobre a Utilização Terapêutica da Cannabis e dos Canabinoides. Acta Med Port 32:87. DOI: 10.20344/amp.10896
		21.	Rodrigues RFB (2019) Mercado da canábis com uso terapêutico no mundo: Perspectivas para Portugal. Dissertation, Instituto universitário egas moniz
		22.	INFARMED (2019) 1/3 Deliberação nº 11/CD/2019
		23.	INFARMED, I.P. (2021). https://www.infarmed.pt/web/infarmed/infarmed. Accessed 25 Apr 2021
		24.	Arana X (2019) Cannabis Regulation in Europe: Country Report Spain
		25.	Frank Zobel (2019) Cannabis Regulation in Europe: Country Report Switzerland
		26.	Areesantichai C, Perngparn U, Pilley C (2020) Current cannabis-related situation in the Asia-Pacific region. Curr Opin Psychiatry 33:352–359. DOI: 10.1097/YCO.0000000000000616
		27.	Government of Australia (2016) Authorised Version Explanatory Statement 1989:1–4
		28.	Lintzeris N, Driels J, Elias N, et al (2018) Medicinal cannabis in Australia, 2016: The cannabis as medicine survey (CAMS-16). Med J Aust 209:211–216. DOI: 10.5694/mja17.01247
		29.	Medicinal Cannabis Agency | Ministry of Health NZ. https://www.health.govt.nz/our-work/regulation-health-and-disability-system/medicinal-cannabis-agency. Accessed 15 Feb 2021
		30.	New Zealand (2019) Misuse of Drugs (Medicinal Cannabis) Regulations 2019. Ministry of Health
		31.	Medicinal Cannabis Agency (2020) Guideline on the Regulation of Medicinal Cannabis in New Zealand
		32.	Rychert M, Wilkins C, Noller G (2019) Medicinal Cannabis Scheme in New Zealand: lessons from international experience and our own recent drug policy reform setbacks. N Z Med J 132:8–12
		33.	South African Health Products Regulatory Authority (2019) Cultivation of Cannabis and manufacture of Cannabis-related pharmaceutical products for medicinal and research purposes
		34.	Cáceres Guido P, Riva N, Calle G, et al (2020) Medicinal cannabis in Latin America: History, current state of regulation, and the role of the pharmacist in a new clinical experience with cannabidiol oil. J Am Pharm Assoc 60:212–215. DOI: 10.1016/j.japh.2019.09.012
		35.	Republica Argentina (2017) Ley 27350
		36.	Agência Nacional de Vigilância Sanitária (2019) RDC n. 327 de 9 de dezembro de 2019. n. 239, Brasília, DF, Brasil
		37.	Agência Nacional de Vigiância Sanitária (2020) RDC n. 335 de 24 de janeiro de 2020. n. 18, Brasília, DF, Brasil
		38.	Agência Nacional de Vigiância Sanitária (2017) Nota Técnica no 01/2017/GMESP/GGMED/ANVISA. 1–4
		39.	Santé Canada (2016) Comprendre le nouveau Règlement sur l’accès au cannabis à des fins médicales
		40.	Santé Canada (2019) Règlement sur l ’ accès au cannabis à des fins médicales
		41.	Rebolledo MB (2020) Surgimiento de organizaciones de pacientes por el cannabis medicinal en Chile: Delimitación del campo científico, monopolio de la enunciación e injusticia epistémica. Rev Temat
		42.	Calderón Vallejo GA, Pareja Hincapié LM, Caicedo Cano C, Chica Ríos RA (2017) Regulación Del Uso De Marihuana En Colombia Con Fines Medicinales. Hacia la promoción la salud 22:43–55. DOI: 10.17151/hpsal.2017.22.1.4
		43.	Estados Unidos Mexicanos (2021) Reglamento de la Ley General de Salud en Materia de Control Sanitario para la Producción, Investigación y Uso Medicinal de la Cannabis y sus Derivados Farmacológicos.
		44.	Klieger SB, Gutman A, Allen L, et al (2017) Mapping medical marijuana: state laws regulating patients, product safety, supply chains and dispensaries, 2017. Addiction 112:2206–2216. DOI: 10.1111/add.13910
		45.	Corda A, Fusero M (2016) Cannabis in Latin America and the Caribbean: From punishment to regulation
		46.	Camara de representantes de la Republica de Uruguay (2018) Ley No 19.172 Marihuana y sus Derivados
